# Supplementary material for: A New Mechanism for Ginsenoside Rb1 to Promote Glucose Uptake, Regulating Riboflavin Metabolism and Redox Homeostasis
Source: MDPI journal article supplement (doi:10.3390/metabo12111011), 2022-10-23
Supplement: s1 [file s1]

## Supplementary materials

### A New Mechanism for Ginsenoside Rb1 to Promote Glucose Uptake, Regulating Riboflavin Metabolism and Redox Homeostasis

Yihan Liu <sup>1,†</sup>, Yuchan Deng <sup>1,†</sup>, Fengyu Wang <sup>1</sup>, Xiaoyi Liu <sup>1</sup>, Jiaqi Wang <sup>1</sup>, Jian Xiao <sup>2</sup>, Cunli Zhang <sup>1,\*</sup>,  
and Qiang Zhang <sup>1,2,\*</sup>

<sup>1</sup> Shaanxi Key Laboratory of Natural Products & Chemical Biology, College of Chemistry & Pharmacy, Northwest A&F University, Yangling 712100, China

<sup>2</sup> Shaanxi Key Laboratory of Phytochemistry, College of Chemistry and Chemical Engineering, Baoji University of Arts and Sciences, Baoji 721013, China

## Contents

|                                                                                                                                                                            |   |
|----------------------------------------------------------------------------------------------------------------------------------------------------------------------------|---|
| Abbreviation List.....                                                                                                                                                     | 2 |
| Figure S1. <sup>1</sup> H NMR Spectrum of Ginsenoside Rb1 .....                                                                                                            | 3 |
| Figure S2. <sup>13</sup> C NMR Spectrum of Ginsenoside Rb1 .....                                                                                                           | 4 |
| Figure S3. HR ESI MS spectrum of Ginsenoside Rb1 .....                                                                                                                     | 5 |
| Figure S4. Fluorescence microscopy images of ROS production (A) and cell death (B) in DM Zebrafish larvae treated with different concentrations of GRb1 .....              | 6 |
| Figure S5. Fluorescence microscopy images of ROS production ((A) and cell death (B) in diabetic Zebrafish larvae treated with different concentrations of riboflavin. .... | 7 |
| Table S1. Primer sequences of the tested genes .....                                                                                                                       | 9 |
| Table S2. Differential expressed metabolites .....                                                                                                                         | 9 |

## **Abbreviations List**

2-NBDG, 2-Deoxy-2-[(7-nitro-2,1,3-benzoxadiazol-4-yl) amino]-D-glucose

AO, acridine orange

CAT, catalase

DCFH-DA, 2,7-Dichlorodihydrofluorescein diacetate

FAD, flavin adenine dinucleotide

FC, fold change

FMN, flavin mononucleotide

GRb1, ginsenoside Rb1

GSH, Glutathione

GSH-Px, glutathione peroxidase

GSSG, glutathione disulfide

hpf, hour post fertilization

IGT, impaired glucose tolerance

KEGG, Kyoto Encyclopedia of Genes and Genomes

MDA, malondialdehyde

PCA, principal component analysis

PLS-DA, partial least squares discriminant analysis

PTU, N-Phenylthiourea

RFK, riboflavin kinase

RT-qPCR, real-time quantitative

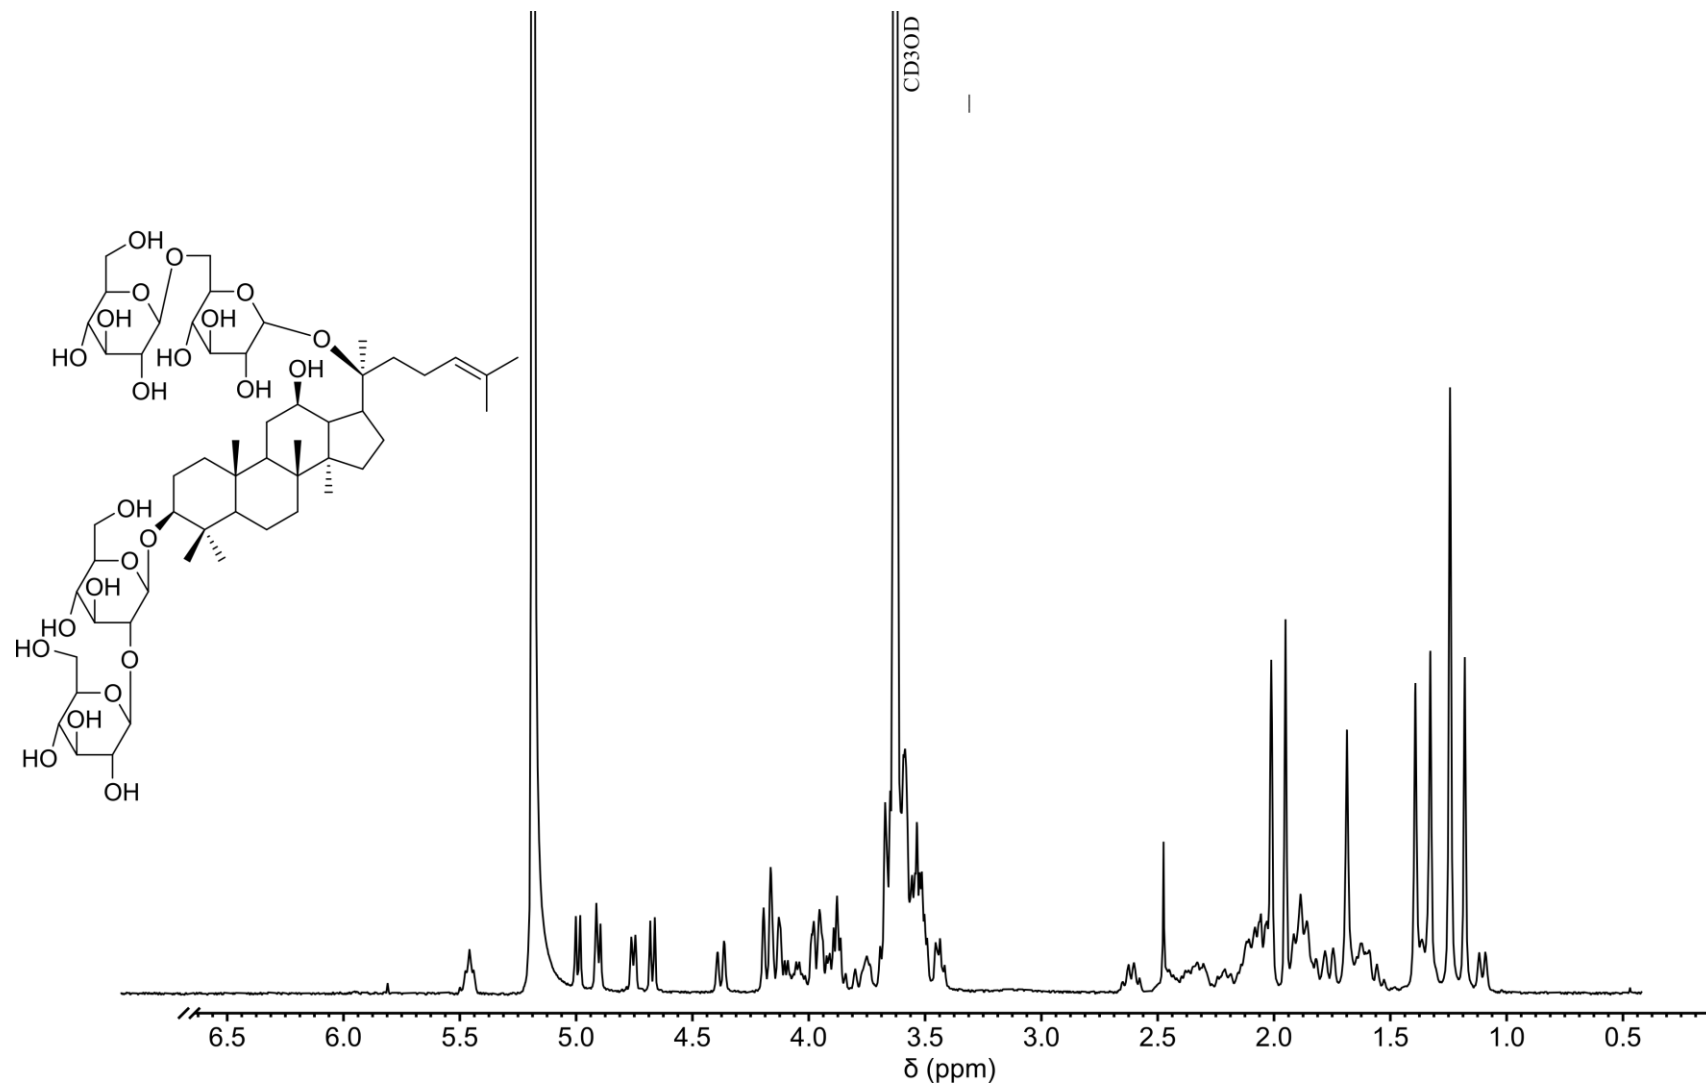

**Figure S1.**  $^1\text{H}$  NMR Spectrum of Ginsenoside Rb1



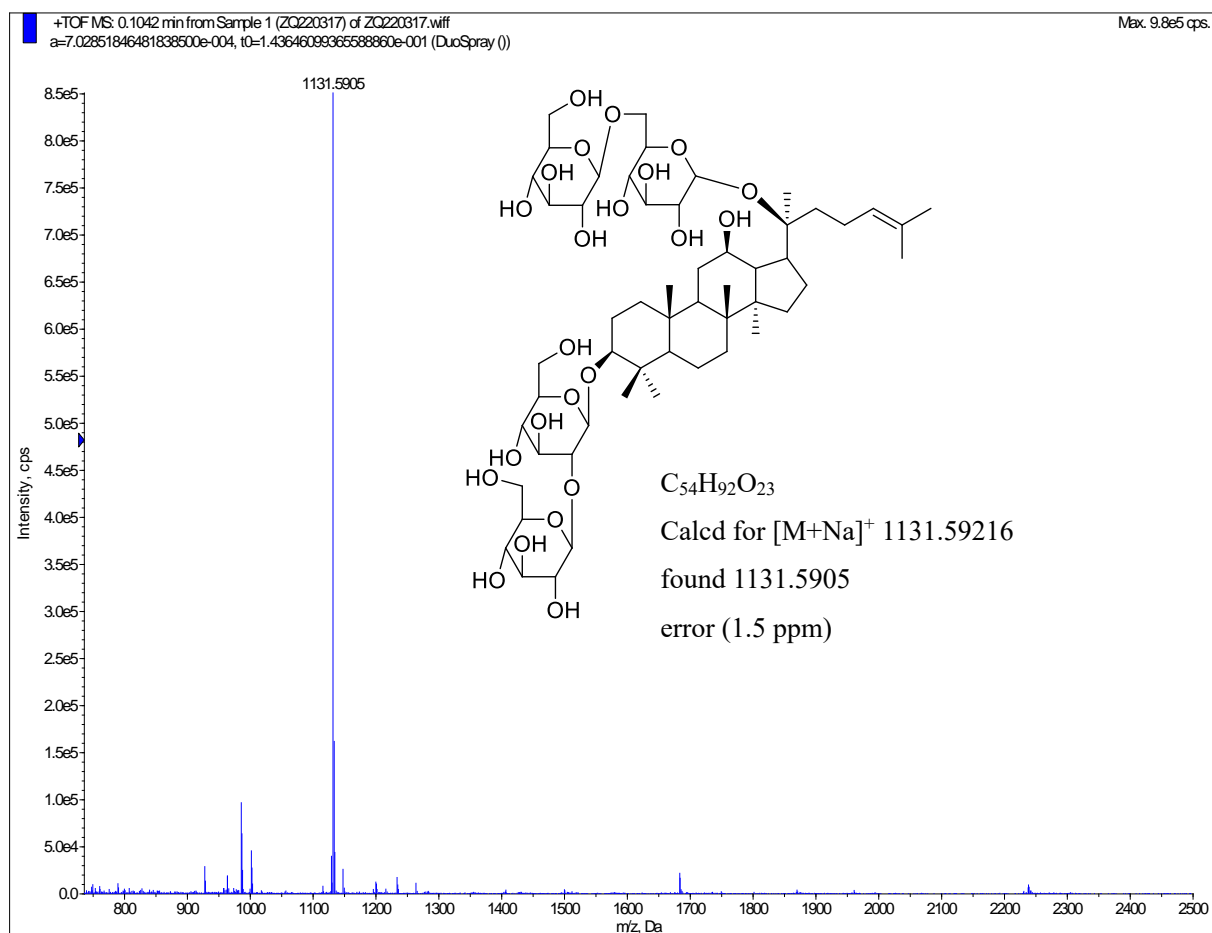

**Figure S3.** HR ESI MS spectrum of Ginsenoside Rb1

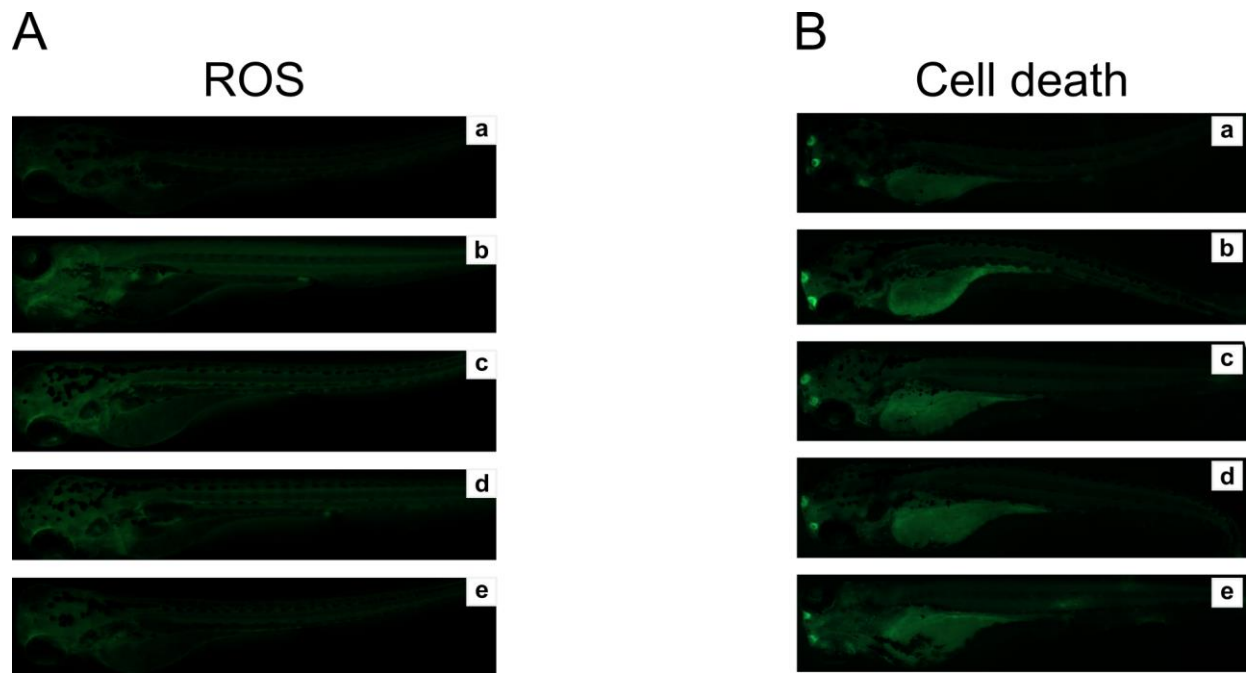

**Figure S4.** Fluorescence microscopy images of ROS production (A) and cell death (B) in DM Zebrafish larvae treated with different concentrations of GRb1. Control (a), model: 4% glucose + 0.2 mM alloxan (b), 20 µg/mL GRb1 (c), 60 µg/mL GRb1 (d), 100 µg/ mL GRb1 (e).

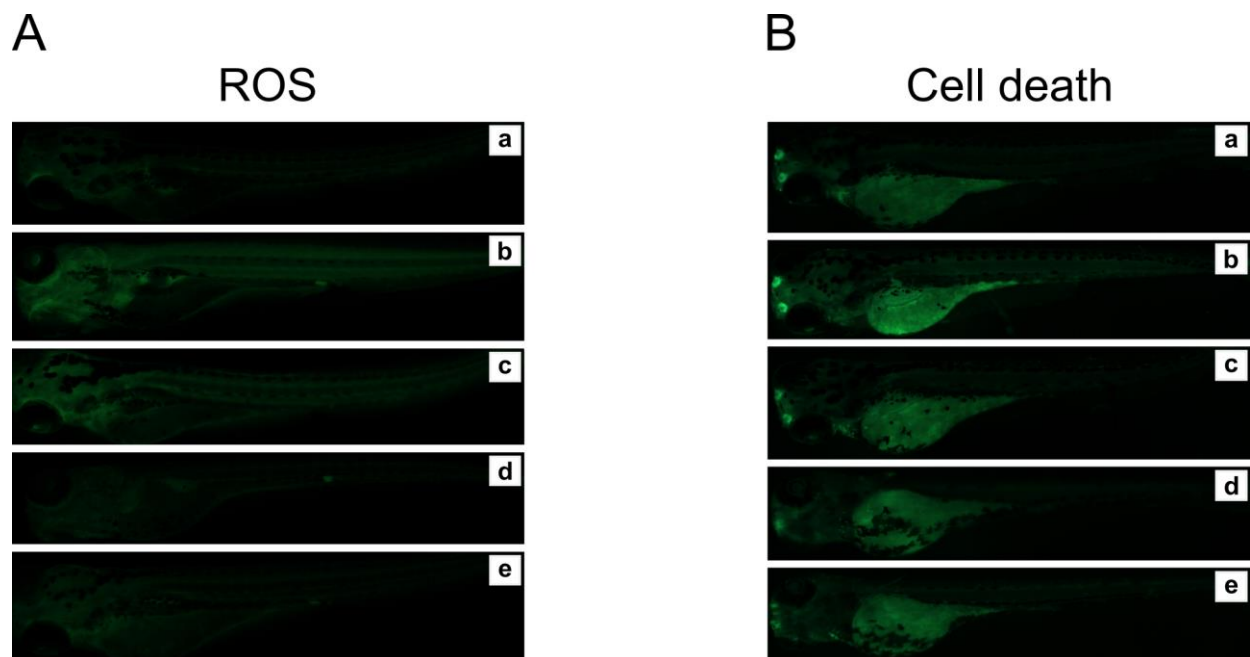

**Figure S5.** Fluorescence microscopy images of ROS production ((A) and cell death (B) in diabetic Zebrafish larvae treated with different concentrations of riboflavin. Control (a), model: 4% Glucose + 0.2 mM alloxan (b), 5  $\mu$ M riboflavin (c), 10  $\mu$ M riboflavin (d) and 20  $\mu$ M riboflavin (e).

**Table S1.** Primer sequences of the tested genes

| <b>Gene</b>                     | <b>FP Sequence (5'-3')</b> | <b>RP Sequence (5'-3')</b> |
|---------------------------------|----------------------------|----------------------------|
| <i>SLC52A1</i>                  | GAACGCTTTTACGTTGCGGT       | GACCTGTCTCCAGTTACGCC       |
| <i>SLC52A3a</i>                 | ATCTTTGGACAACCTCGTAGCACAG  | GGCAGGAAGGTAACAGACGAAGTG   |
| <i>SLC52A3b</i>                 | AGCGCTGCATTACTGTCACT       | CCAAACCGCTGAGACCTTCT       |
| <i>RFK</i>                      | GCATCTACTACGGTTGGGCA       | TTCAGGGCGAATGTAGCCAG       |
| <i><math>\beta</math>-actin</i> | F CGTGCTGTCTTCCCATCCA      | TCACCAACGTAGCTGTCTTTCTG    |



**Table S2.** Differential expressed metabolites

| KEGG ID | Metabolite name | Formula                                                         | RT/min | <i>m/z</i> | contrast                           |
|---------|-----------------|-----------------------------------------------------------------|--------|------------|------------------------------------|
| C00148  | Proline         | C <sub>5</sub> H <sub>9</sub> NO <sub>2</sub>                   | 1.035  | 116.0693   | G3 <i>vs.</i> G2, G4 <i>vs.</i> G2 |
| C00408  | L-Pipecolate    | C <sub>6</sub> H <sub>11</sub> NO <sub>2</sub>                  | 0.952  | 130.0853   | G3 <i>vs.</i> G2, G4 <i>vs.</i> G2 |
| C00047  | Lysine          | C <sub>6</sub> H <sub>14</sub> N <sub>2</sub> O <sub>2</sub>    | 0.948  | 147.1122   | G3 <i>vs.</i> G2, G4 <i>vs.</i> G2 |
| C09315  | Umbelliferone   | C <sub>9</sub> H <sub>6</sub> O <sub>3</sub>                    | 6.988  | 163.0384   | G3 <i>vs.</i> G2, G4 <i>vs.</i> G2 |
| C01742  | Palatinose      | C <sub>12</sub> H <sub>22</sub> O <sub>11</sub>                 | 6.520  | 360.1505   | G3 <i>vs.</i> G2, G4 <i>vs.</i> G2 |
| C10453  | Eugenol         | C <sub>10</sub> H <sub>12</sub> O <sub>2</sub>                  | 4.932  | 165.0895   | G3 <i>vs.</i> G2                   |
| C17957  | Irigenin        | C <sub>18</sub> H <sub>16</sub> O <sub>8</sub>                  | 5.263  | 361.0858   | G3 <i>vs.</i> G2                   |
| C00183  | Valine          | C <sub>5</sub> H <sub>11</sub> NO <sub>2</sub>                  | 1.028  | 118.0853   | G4 <i>vs.</i> G2                   |
| C01879  | Pidolic acid    | C <sub>5</sub> H <sub>7</sub> NO <sub>3</sub>                   | 1.030  | 130.0490   | G4 <i>vs.</i> G2                   |
| C00262  | Hypoxanthine    | C <sub>5</sub> H <sub>4</sub> N <sub>4</sub> O                  | 1.418  | 137.0447   | G4 <i>vs.</i> G2                   |
| C00064  | Glutamine       | C <sub>5</sub> H <sub>10</sub> N <sub>2</sub> O <sub>3</sub>    | 1.033  | 147.0765   | G4 <i>vs.</i> G2                   |
| C00319  | Sphing-4-enine  | C <sub>18</sub> H <sub>37</sub> NO <sub>2</sub>                 | 12.021 | 300.2901   | G4 <i>vs.</i> G2                   |
| C00051  | Glutathione     | C <sub>10</sub> H <sub>17</sub> N <sub>3</sub> O <sub>6</sub> S | 1.081  | 308.0891   | G4 <i>vs.</i> G2                   |
| C00255  | Riboflavin      | C <sub>17</sub> H <sub>20</sub> N <sub>4</sub> O <sub>6</sub>   | 3.184  | 377.1455   | G4 <i>vs.</i> G2                   |
